# Supplementary material
Source: ML conference proceedings conference paper supplement (https://proceedings.neurips.cc/paper_files/paper/2015/hash/f50a6c02a3fc5a3a5d4d9391f05f3efc-Abstract.html)
Supplement: Supplementary file [file f50a6c02a3fc5a3a5d4d9391f05f3efc-Supplemental.zip]

---

# Preconditioned Spectral Descent for Deep Learning: Supplemental Material

---

David E. Carlson,<sup>1</sup> Edo Collins,<sup>2</sup> Ya-Ping Hsieh,<sup>2</sup> Lawrence Carin,<sup>3</sup> Volkan Cevher<sup>2</sup>

<sup>1</sup> Department of Statistics, Columbia University

<sup>2</sup> Laboratory for Information and Inference Systems (LIONS), EPFL

<sup>3</sup> Department of Electrical and Computer Engineering, Duke University

| Parameter          | SGD       | ADAggrad  | RMSprop   | SSD           | SSD-F         | ADAspec                      | RMSspec                      |
|--------------------|-----------|-----------|-----------|---------------|---------------|------------------------------|------------------------------|
| <b>W</b> Step size | $10^{-1}$ | $10^{-1}$ | $10^{-3}$ | $1/\sqrt{MJ}$ | $1/\sqrt{MJ}$ | $\frac{1}{2} \times 10^{-3}$ | $\frac{1}{2} \times 10^{-3}$ |
| $\lambda$          | –         | $10^{-3}$ | $10^{-3}$ | –             | –             | $10^{-3}$                    | $10^{-3}$                    |
| $\alpha$           | –         | –         | .95       | –             | –             | –                            | .95                          |
| Projections        | –         | –         | –         | –             | 30            | 30                           | 30                           |

Table 1: Parameter Settings for Learning RBMs. RMSprop parameters chosen to match [5]. SGD parameters chosen to match [26]. SSD and A-SSD stepsizes and geometries chosen to match [1]. The stepsize on **W** is given for the RBM.  $\lambda$  corresponds to the damping factor in the history terms in the ADA and RMS methods. Projections refers to the numbers of projections used in the Random SVD algorithm [9] in the approximate #-operator (Section 2.4).

| Parameter          | SGD               | ADAggrad          | RMSprop           | SSD                               | ADAspec           | RMSspec           |
|--------------------|-------------------|-------------------|-------------------|-----------------------------------|-------------------|-------------------|
| Batch size         | 100               | 100               | 100               | 500/1500                          | 500/1500          | 500/1500          |
| <b>W</b> Step size | $5 \cdot 10^{-2}$ | $3 \cdot 10^{-2}$ | $2 \cdot 10^{-2}$ | $2 \cdot 10^{-2}/5 \cdot 10^{-3}$ | $10^{-2}$         | $10^{-3}/10^{-2}$ |
| $\lambda$          | –                 | $10^{-1}$         | $10^{-1}$         | –                                 | $5 \cdot 10^{-2}$ | $5 \cdot 10^{-2}$ |
| $\alpha$           | –                 | –                 | .9                | –                                 | –                 | .9                |
| Projections        | –                 | –                 | –                 | 30                                | 30                | 30                |

Table 2: Parameter Settings for Learning NNs/CNNs. See caption of Table 1 for a description of parameters.

---

### Algorithm 3 Sharp Operator

---

Inputs:  $\mathbf{X}$

$[\mathbf{U}, \mathbf{s}, \mathbf{V}] = \text{SVD}(\mathbf{X})$

Return  $\mathbf{X}^\# = \|\mathbf{s}\|_1 \mathbf{U} \mathbf{V}^T$

---



---

### Algorithm 4 Flat Operator

---

Inputs:  $\mathbf{x}$

Return  $\mathbf{x}^\flat = \|\mathbf{x}\|_1 \times \text{SIGN}(\mathbf{x})$

---

---

**Algorithm 5** Approximate Sharp Operator

---

Inputs:  $\mathbf{X} \in \mathbb{R}^{M \times J}$ , approximation level  $R$ , stabilizing value  $\epsilon$   
 $[\mathbf{U}, \mathbf{s}, \mathbf{V}] = \text{RANDOMSVD}(\mathbf{X}, R)$  (Rank  $R$  approximation from [9])  
 $\mathbf{Y} = \mathbf{X} - \mathbf{U}\text{DIAG}(\mathbf{s})\mathbf{V}^T$   
 $l = \|\mathbf{Y}\|_{S^\infty}$  (power method)  
Return  $\mathbf{X}^\# = \|\mathbf{s}\|_1 \mathbf{U}\mathbf{V}^T + (\|\mathbf{s}\|_1 / (l + \epsilon)) \mathbf{Y}$

---

## A Additional Method Details

### A.1 Non-Euclidean Gradient Descent for Deep Learning Models

The purpose of this subsection is to show that  $\|\cdot\|_\infty$  and  $\|\cdot\|_{S^\infty}$  are much better choices than  $\|\cdot\|_2$  and  $\|\cdot\|_F$  for analyzing deep learning models. Our insight builds on a novel lemma regarding the properties of the log-sum-exp function. In Section 3 we show that, for many deep learning models, training is equivalent to the optimization problem

$$\min_{\boldsymbol{\theta}} g(\boldsymbol{\theta}) + lse(\boldsymbol{\alpha}(\boldsymbol{\theta})), \quad (7)$$

where  $g(\cdot)$  and  $\boldsymbol{\alpha}(\cdot)$  are functions depending on the input data and the chosen model, and  $lse(\cdot)$  denotes the log-sum-exp function:  $lse(\boldsymbol{\alpha}) = \log \sum_{i=1}^N \exp(\alpha^i)$ . The analysis for  $g(\cdot)$  and  $\boldsymbol{\alpha}(\cdot)$  must be done on a case-by-case basis. This is discussed for feed-forward neural networks in Section 3.2, and implicitly treated this way for RBMs in [1]. Our aim here is to give a general treatise for  $lse(\cdot)$ . The following simple theorem sheds some light on the behavior of  $lse(\cdot)$ , whose proof can be found in the Supplemental Section B.

**Theorem A.1** *Let  $F(\cdot) = lse(\cdot)$ . Suppose that the entries of  $\boldsymbol{\alpha}$  are (possibly dependent)  $N$  zero-mean sub-Gaussian random variables. Then it holds that*

$$L_\infty \mathbb{E} \|\boldsymbol{\alpha}\|_\infty^2 = \mathcal{O}(\log N), \quad L_2 \mathbb{E} \|\boldsymbol{\alpha}\|_2^2 = \Omega\left(\frac{N}{\log N}\right). \quad (8)$$

We remark that Theorem A.1 can be easily strengthened to hold with overwhelming probability; for illustration purposes we will only work with expectation results. As well, the constants  $L_\infty$  and  $L_2$  are similar, with  $L_2 \leq \frac{1}{2}$  and  $\Omega(\log N)$  and  $L_\infty \leq 1$  [1]. This emphasizes that  $\ell_\infty$  is dramatically better for  $lse(\cdot)$  optimization. In [1], it was demonstrated that the  $\ell_\infty$  bound combined with the properties of  $\boldsymbol{\alpha}(\cdot)$  propagates to a  $S_\infty$  bound on matrix parameters in an RBM. This similarly happens in the feed-forward neural nets. We give this result in Section 3.2 and give specific mathematical details in Supplemental Section D.

### A.2 Tighter Majorization Bounds in Deep Learning

It is well-known that most deep learning models result in a *non-convex*  $g(\cdot)$  and  $\boldsymbol{\alpha}(\cdot)$ , and one can not reach a global optimum through a convex optimization method. Moreover, obtaining the exact gradient for either  $g(\cdot)$  or  $lse(\boldsymbol{\alpha}(\cdot))$  is a computationally prohibitive task. Therefore, the goal here is to quickly search for a local minimum of (7) with the help of noisy gradient estimates. Such a procedure is empirically justified, and is what we adopt in this paper.

Our strategy runs as follows. First, we derive a global majorization bound for  $g(\boldsymbol{\theta})$ , say  $g(\boldsymbol{\theta}') \leq g(\boldsymbol{\theta}) + U(\boldsymbol{\theta}, \boldsymbol{\theta}')$ . In view of (1), we have arrived at a global majorization bound on the objective function:

$$\begin{aligned} g(\boldsymbol{\theta}') + lse(\boldsymbol{\alpha}(\boldsymbol{\theta}')) &\leq g(\boldsymbol{\theta}) + U(\boldsymbol{\theta}, \boldsymbol{\theta}') + lse(\boldsymbol{\alpha}(\boldsymbol{\theta})) \\ &\quad + \langle \nabla lse(\boldsymbol{\alpha}(\boldsymbol{\theta})), \boldsymbol{\alpha}(\boldsymbol{\theta}') - \boldsymbol{\alpha}(\boldsymbol{\theta}) \rangle + \frac{L_p}{2} \|\boldsymbol{\alpha}(\boldsymbol{\theta}') - \boldsymbol{\alpha}(\boldsymbol{\theta})\|_p^2 \\ &\triangleq r(\boldsymbol{\theta}, \boldsymbol{\theta}'). \end{aligned} \quad (9)$$

Setting  $\boldsymbol{\theta}_{k+1} = \arg \min_{\boldsymbol{\theta}'} r(\boldsymbol{\theta}_k, \boldsymbol{\theta}')$  gives our algorithm.

It is evident that our algorithm works well only if the majorization bound (9) is tight. Now, Theorem A.1 implies that using  $p = \infty$  improves this majorization bound over  $p = 2$  by a factor

of at least  $\frac{\log^2 N}{N}$ , provided that  $\alpha(\theta_k) - \alpha(\theta_{k+1})$  has zero-mean sub-Gaussian entries. (Here, the randomness of  $\alpha(\theta_k)$  or  $\alpha(\theta_{k+1})$  arises from the noise of gradient estimates.) Because we are changing the parameters we do not necessarily expect zero-mean entries, but the scaling result is bound by  $\|\cdot\|_\infty$  rather than  $\|\cdot\|_2$ .

So far, we have shown that  $\|\cdot\|_\infty$ , instead of the commonly adopted  $\|\cdot\|_2$ , is a natural choice for analyzing deep learning models. When these bounds are applied and propagated to the parameters by analyzing the max change in  $\alpha(\cdot)$ , they naturally form a bound on the maximum singular value on the perturbation about matrix parameter, or the Schatten- $\infty$  norm.

## B Proof of Theorem A.1

We will use the following elementary facts: If  $\alpha_1, \alpha_2, \dots, \alpha_N$  are (possibly dependent) zero-mean sub-Gaussian random variables, then

$$\left(\mathbb{E} \max_i \alpha_i\right)^2 = \mathcal{O}(\log N), \quad \left(\mathbb{E} \sum_{i=1}^N \alpha_i^2\right) = \Theta(N). \quad (10)$$

In [1], it is derived that  $L_\infty \leq 1$  for  $lse(\cdot)$ . Hence it remains to show  $L_2 = \Omega\left(\frac{1}{\log N}\right)$ .

Consider the bound

$$lse(\mathbf{y}) \leq lse(\mathbf{x}) + \langle \nabla lse(\mathbf{x}), \mathbf{y} - \mathbf{x} \rangle + \frac{L_2}{2} \|\mathbf{y} - \mathbf{x}\|_2^2, \quad (11)$$

which must hold for all  $\mathbf{x}, \mathbf{y}$ . Let  $\mathbf{y}$  be the all 0 vector, and let  $\mathbf{x}$  have  $\delta$  in its first entry, and 0 otherwise. Substituting these into (11), we get

$$\log N \leq \log(e^\delta + N - 1) - \frac{\delta e^\delta}{e^\delta + N - 1} + \frac{\delta^2 L_2}{2} \quad (12)$$

where we have used the formula  $\nabla lse(\mathbf{x}) = \frac{\exp(\mathbf{x})}{\sum_{i=1}^N e^{x_i}}$ . Setting  $\delta = \log N$  and rearranging, we get

$$L_2 \geq 2 \left( \frac{1}{\log^2 N} \log \frac{N}{2N-1} + \frac{1}{\log N} \cdot \frac{N}{2N-1} \right) = \Omega\left(\frac{1}{\log N}\right). \quad (13)$$

which is the desired result.

## C Preconditioned #-Operator Updates

We give the proof of a general form of the iteration (6), which also applies to our  $\flat$ -operator in the vector case. Let  $\|\cdot\|$  be an arbitrary norm and let its corresponding #-operator be  $\mathbf{s}^\# = \arg \min_{\mathbf{x}} \{\langle \mathbf{s}, \mathbf{x} \rangle - \frac{1}{2} \|\mathbf{x}\|^2\}$ . It is shown in [1] that the minimizer of

$$\min_{\mathbf{y}} F(\mathbf{x}) + \langle \nabla F(\mathbf{x}), \mathbf{y} - \mathbf{x} \rangle + \frac{1}{2\epsilon} \|\mathbf{y} - \mathbf{x}\|^2$$

is given by

$$\mathbf{y} = \mathbf{x} - \epsilon [\nabla F(\mathbf{x})]^\#. \quad (14)$$

Now, our objective function is given by

$$\min_{\mathbf{y}} F(\mathbf{x}) + \langle \nabla F(\mathbf{x}), \mathbf{y} - \mathbf{x} \rangle + \frac{1}{2\epsilon} \|\mathbf{D}(\mathbf{y} - \mathbf{x})\|^2 \quad (15)$$

for some positive definite and diagonal  $\mathbf{D}$ . Notice that  $\langle \nabla F(\mathbf{x}), \mathbf{y} - \mathbf{x} \rangle = \langle \mathbf{D}^{-1} \nabla F(\mathbf{x}), \mathbf{D}(\mathbf{y} - \mathbf{x}) \rangle$ . Applying (14) to  $\mathbf{y}' = \mathbf{D}\mathbf{y}$  and  $\mathbf{x}' = \mathbf{D}\mathbf{x}$ , we see that the minimizer of (15) is  $\mathbf{y}' = \mathbf{x}' - \epsilon [\mathbf{D}^{-1} \nabla F(\mathbf{x})]^\#$ . Multiplying both sides by  $\mathbf{D}^{-1}$  proves (6).

## D Feedforward Neural Net Schatten- $\infty$ Bound Result

Since the softmax classifier log-likelihood objective function has the bound

$$f(\phi) \leq f(\theta) + \langle \nabla_{\theta} f(\theta), \phi - \theta \rangle + \frac{1}{N} \sum_{n=1}^N \left( \frac{1}{2} \max_j (h_{n,\phi,j} - h_{n,\theta,j})^2 + 2 \max_j |h_{n,\phi,j} - h_{n,\theta,j} - \langle \nabla_{\theta} h_{n,\theta,j}, \phi - \theta \rangle| \right),$$

this requires that we analyze  $(h_{n,\phi,j} - h_{n,\theta,j})^2$  and  $|h_{n,\phi,j} - h_{n,\theta,j} - \langle \nabla_{\theta} h_{n,\theta,j}, \phi - \theta \rangle|$ . Note that the following relationships hold and are standard

$$\begin{aligned} \|\mathbf{X}\mathbf{y}\|_2 &\leq \|\mathbf{X}\|_{S^\infty} \|\mathbf{y}\|_2, \\ \|\mathbf{z}^T \mathbf{X}\mathbf{y}\|_2 &\leq \|\mathbf{X}\|_{S^\infty} \|\mathbf{y}\|_2 \|\mathbf{z}\|_2, \\ \|\mathbf{x} \odot \mathbf{y}\|_2 &\leq \|\mathbf{x}\|_\infty \|\mathbf{y}\|_2. \end{aligned}$$

Besides, the following elementary formulae hold:

$$\nabla_{\mathbf{w}_\ell} h_j = ((\nabla_{\alpha_{\ell+1}} h_j) \odot \eta'(\mathbf{W}_\ell \alpha_\ell)) \alpha_\ell^T,$$

$$\nabla_{\alpha_\ell} h_j = \mathbf{W}_\ell^T ((\nabla_{\alpha_{\ell+1}} h_j) \odot \eta'(\mathbf{W}_\ell \alpha_\ell)).$$

Considering a single data point, for  $(h_{\phi,j} - h_{\theta,j})^2$ , we can get the bound for block-coordinate-wise updates for  $\mathbf{W}_\ell$  to  $\mathbf{W}_\ell + \mathbf{U}$  by noting

$$\begin{aligned} &(h_{\mathbf{w}_{\ell+\mathbf{U},j}} - h_{\mathbf{w}_{\ell,j}})^2 \\ &= \left( \int_0^1 \text{tr} \left( ((\nabla_{\alpha_{\ell+1}} h_{\mathbf{w}_{\ell+t\mathbf{U},j}}) \odot \eta'((\mathbf{W}_\ell + t\mathbf{U})\alpha_\ell)) \alpha_\ell^T \mathbf{U}^T \right) dt \right)^2 \\ &= \left( \int_0^1 ((\nabla_{\alpha_{\ell+1}} h_{\mathbf{w}_{\ell+t\mathbf{U},j}}) \odot \eta'((\mathbf{W}_\ell + t\mathbf{U})\alpha_\ell))^T \mathbf{U} \alpha_\ell dt \right)^2 \\ &\leq \left( \int_0^1 \|(\nabla_{\alpha_{\ell+1}} h_{\mathbf{w}_{\ell+t\mathbf{U},j}}) \odot \eta'((\mathbf{W}_\ell + t\mathbf{U})\alpha_\ell)\|_2 \|\mathbf{U}\|_{S^\infty} \|\alpha_\ell\|_2 dt \right)^2 \\ &\leq \|\mathbf{U}\|_{S^\infty}^2 \|\alpha_\ell\|_2^2 \max_{t \in [0,1]} \|(\nabla_{\alpha_{\ell+1}} h_{\mathbf{w}_{\ell+t\mathbf{U},j}}) \odot \eta'((\mathbf{W}_\ell + t\mathbf{U})\alpha_\ell)\|_2^2. \end{aligned}$$

The important term here is

$$\|(\nabla_{\alpha_{\ell+1}} h_{\mathbf{w}_{\ell+t\mathbf{U},j}}) \odot \eta'((\mathbf{W}_\ell + t\mathbf{U})\alpha_\ell)\|_2^2.$$

If we approximate this term locally at  $t = 0$ , then this term can be bound

$$\|(\nabla_{\alpha_{\ell+1}} h_{\mathbf{w}_{\ell+t\mathbf{U},j}}) \odot \eta'((\mathbf{W}_\ell + t\mathbf{U})\alpha_\ell)\|_2^2|_{t=0} \leq \|(\nabla_{\alpha_{\ell+1}} h_{\mathbf{w}_{\ell,j}}) \odot \eta'(\mathbf{W}_\ell \alpha_\ell)\|_2^2 \max_{x'} \frac{d}{dx} \eta(x)|_{x=x'}.$$

Union bound can be applied to make this apply to all data points. This recovers the form in Section 3.2. The second term,  $|h_{n,\phi,j} - h_{n,\theta,j} - \langle \nabla_{\theta} h_{n,\theta,j}, \phi - \theta \rangle|$ , can be bound for  $\mathbf{W}_\ell$  to  $\mathbf{W}_\ell + \mathbf{U}$  with

$$\begin{aligned} &\max_j |h_{\mathbf{w}_{\ell+\mathbf{U},j}} - h_{\mathbf{w}_{\ell,j}} - \langle \nabla_{\mathbf{w}_\ell} h_{\mathbf{w}_{\ell,j}}, \mathbf{U} \rangle| \\ &= \left| \int_0^1 ((\nabla_{\alpha_{\ell+1}} h_{\mathbf{w}_{\ell+t\mathbf{U},j}}) \odot \eta'((\mathbf{W}_\ell + t\mathbf{U})\alpha_\ell) - (\nabla_{\alpha_{\ell+1}} h_{\mathbf{w}_{\ell,j}}) \odot \eta'(\mathbf{W}_\ell \alpha_\ell))^T \mathbf{U} \alpha_\ell dt \right| \\ &\leq \int_0^1 \|(\nabla_{\alpha_{\ell+1}} h_{\mathbf{w}_{\ell+t\mathbf{U},j}}) \odot \eta'((\mathbf{W}_\ell + t\mathbf{U})\alpha_\ell) - (\nabla_{\alpha_{\ell+1}} h_{\mathbf{w}_{\ell,j}}) \odot \eta'(\mathbf{W}_\ell \alpha_\ell)\|_2 \|\mathbf{U}\|_{S^\infty} \|\alpha_\ell\|_2 dt \\ &= \|\mathbf{U}\|_{S^\infty} \|\alpha_\ell\|_2 \int_0^1 \|(\nabla_{\alpha_{\ell+1}} h_{\mathbf{w}_{\ell+t\mathbf{U},j}}) \odot \eta'((\mathbf{W}_\ell + t\mathbf{U})\alpha_\ell) - (\nabla_{\alpha_{\ell+1}} h_{\mathbf{w}_{\ell,j}}) \odot \eta'(\mathbf{W}_\ell \alpha_\ell)\|_2 dt. \end{aligned}$$

The important term here is

$$\begin{aligned} & \int_0^1 \|(\nabla_{\alpha_{\ell+1}} h_{\mathbf{W}_{\ell+t\mathbf{U},j}}) \odot \eta'((\mathbf{W}_{\ell} + t\mathbf{U})\alpha_{\ell}) - (\nabla_{\alpha_{\ell+1}} h_{\mathbf{W}_{\ell,j}}) \odot \eta'((\mathbf{W}_{\ell})\alpha_{\ell})\|_2 dt \\ & \leq \frac{1}{2} \max_t \left\| \frac{d}{dt} ((\nabla_{\alpha_{\ell+1}} h_{\mathbf{W}_{\ell+t\mathbf{U},j}}) \odot \eta'((\mathbf{W}_{\ell} + t\mathbf{U})\alpha_{\ell})) \right\|_2. \end{aligned}$$

It is possible to bounded this term, but it is highly pessimistic. Instead, approximating this by the quantity around  $t = 0$  gives

$$\lesssim \frac{1}{2} (\|((\nabla_{\alpha_{\ell+1}} h_{\mathbf{W}_{\ell,j}}) \odot \eta'((\mathbf{W}_{\ell})\alpha_{\ell})) \odot \mathbf{U}\alpha_{\ell}\|_2 + \|(\frac{d}{dt} \nabla_{\alpha_{\ell+1}} h_{\mathbf{W}_{\ell+t\mathbf{U},j}})|_{t=0} \odot \eta'((\mathbf{W}_{\ell})\alpha_{\ell})\|_2).$$

For deep networks, the second term will vanish faster then the first. It is ignored heuristically. We separate this into

$$\lesssim \frac{1}{2} \|\nabla_{\alpha_{\ell+1}} h_{\mathbf{W}_{\ell,j}}\|_{\infty} \|\eta'(\mathbf{W}_{\ell}\alpha_{\ell})\|_{\infty} \|\mathbf{U}\alpha_{\ell}\|_2 \lesssim \frac{1}{2} \|\nabla_{\alpha_{\ell+1}} h_{\mathbf{W}_{\ell,j}}\|_{\infty} \|\eta'(\mathbf{W}_{\ell}\alpha_{\ell})\|_{\infty} \|\mathbf{U}\|_{S^{\infty}} \|\alpha_{\ell}\|_2.$$

Combining with (16) recovers the term in the text,

$$\leq \frac{1}{2} \|\mathbf{U}\|_{S^{\infty}}^2 \|\nabla_{\alpha_{\ell+1}} h_{\mathbf{W}_{\ell,j}}\|_{\infty} \|\eta'(\mathbf{W}_{\ell}\alpha_{\ell})\|_{\infty} \|\alpha_{\ell}\|_2^2.$$
